# Supplementary material for: Localized Surface Plasmon-Enhanced Infrared-to-Visible Upconversion Devices Induced by Ag Nanoparticles
Source: MDPI journal article supplement (doi:10.3390/ma16051973), 2023-02-28
Supplement: s1 [file s1]

# Localized Surface Plasmon-Enhanced Infrared-to-Visible Upconversion Devices Induced by Ag Nanoparticles

Yuyi Zhang <sup>1</sup>, Chengjun Liu <sup>1</sup>, Xingyu Liu <sup>1</sup>, Ziyu Wei <sup>1</sup>, Hui Tao <sup>1</sup>, Feng Xu <sup>1</sup>, Lixi Wang <sup>2</sup>, Jiangyong Pan <sup>2</sup>, Wei Lei <sup>1,\*</sup> and Jing Chen <sup>1,\*</sup>

<sup>1</sup> Joint International Research Laboratory of Information Display and Visualization, School of Electronic Science and Engineering, Southeast University, Nanjing 210018, China

<sup>2</sup> School of Electronic and Information Engineering, Nanjing University of Information Science & Technology, Nanjing 210044, China

\* Correspondence: lw@seu.edu.cn (W.L.); chenjing@seu.edu.cn (J.C.)

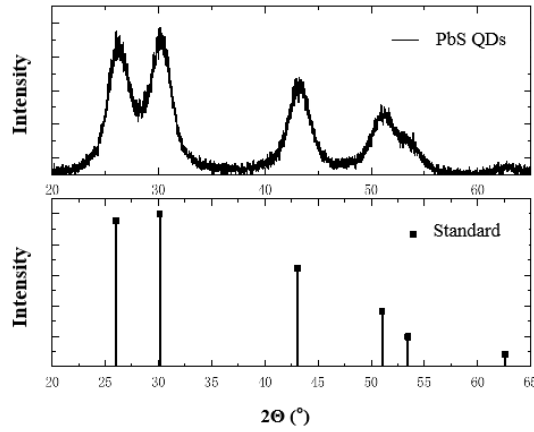

Figure S1. XRD spectra of PbS quantum dots.

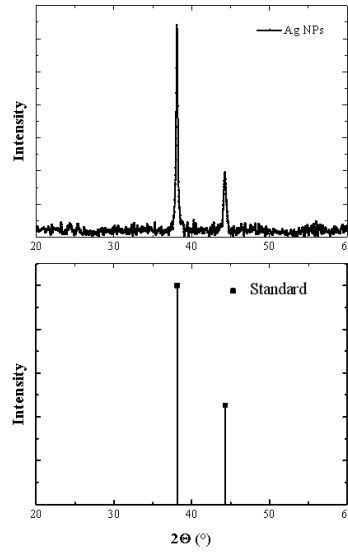

Figure S2. XRD spectra of Ag nanoparticles.

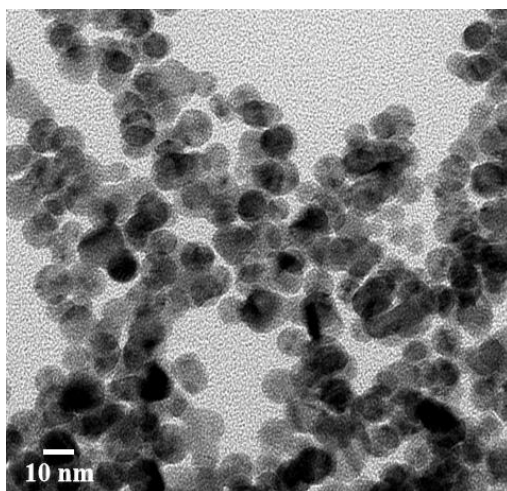

**Figure S3.** TEM image of Ag nanoparticles.

**Table S1.** Information about manufacturer and country.

|                     |               |                 |       |           |         |
|---------------------|---------------|-----------------|-------|-----------|---------|
| <b>Manufacturer</b> | Sigma-Aldrich | Meryer          | Sigma | Sinopharm | Aladdin |
| <b>Country</b>      | America       | China           | China | China     | China   |
| <b>Manufacturer</b> | Macklin       | Energy chemical | Maya  | Acros     | Adamas  |
| <b>Country</b>      | China         | China           | China | Belgium   | China   |
